# Supplementary material
Source: publisher figshare collection journal article supplement (https://frontiersin.figshare.com/ndownloader/files/30446589)
Supplement: Supplementary file 1 [file 30446589]

## Sheet: Sheet1
Event ID	binder_ew							binder_max						Catalog					SRC
	Origin time		Lat.	Lon.	Dep.	nPhase	Status	Origin time	Lat.	Lon.	Dep.	nPhase	Status	Origin time	Mag.	Lat.	Lon.	Dep.
RT01	2020-03-08	19:28:53	33.9194	131.539	8	70								19:28:45	4.9	33.3291	131.993	58	NEIC
RT02	2020-04-10	16:47:48	32.8664	126.406	8	17	killed							16:44:57	6.1	20.4677	122.11	160	NEIC
		16:47:48	32.8254	126.727	8	18	killed
		16:47:48	32.7985	126.728	8	18	killed
		16:48:02	33.8118	127.271	8	17	killed
		16:47:50	32.9909	127.481	8	38
		16:48:04	34.6224	125.988	8	13	killed
		16:48:17	35.5232	127.376	8	11
RT03	2020-04-18	08:28:13	35.4949	128.596	8	11	killed	08:28:16	35.4015	129.565	20	7		08:25:37	6.6	27.1264	140.135	453	NEIC
		08:28:17	35.6861	128.839	20.52	13	killed
		08:28:05	36.4581	127.554	8	16	killed
		08:28:14	35.9617	128.847	8	11	killed
		08:27:50	33.3047	129.815	8	24	killed
		08:28:15	35.5005	128.911	38.5	22	killed
		08:28:14	35.9647	128.86	8	12	killed
		08:28:16	35.6445	128.951	14.75	18	killed
		08:28:12	35.8532	128.816	8	16	killed
		08:28:12	35.3287	128.842	8	18	killed
		08:28:22	36.7249	129.087	39.75	28
		08:28:11	34.9748	128.641	8	20	killed
		08:28:15	35.5256	128.781	20.82	24	killed
		08:28:13	36.0135	128.874	4	16	killed
		08:28:04	33.8638	128.395	8	7
		08:28:08	35.0854	128.816	8	13
RT04	2020-04-18	09:26:32	34.2279	130.496	8	20	killed							09:24:18	5.5	27.2034	140.071	474	NEIC
		09:26:35	34.2867	130.105	8	19	killed
		09:26:52	35.935	128.696	8	17	killed
		09:26:42	36.4607	127.425	8	14	killed
		09:26:53	36.0576	128.194	8	11	killed
		09:26:50	35.954	128.705	8	22	killed
		09:26:48	35.1719	128.772	8	15	killed
		09:26:47	36.2133	127.786	8	14
		09:26:53	36.0704	128.186	8	14	killed
RT05	2020-04-19	02:59:49	38.701	127.972	2	26		02:59:49	38.7516	127.962	0.27	26
RT06	2020-04-20	11:39:10	32.3173	129.402	8	31								11:38:53	4.7	31.1901	130.376	157	NEIC
RT07	2020-05-07	11:28:51	36.1003	128.708	8	10	killed							11:21:20	5.5	-4.4643	154.741	471	NEIC
		11:28:51	36.0943	128.708	8	11	killed
		11:28:55	36.5721	128.345	8	11
RT08	2020-05-10	17:23:59	34.3709	131.281	8	47		17:23:56	34.3252	131.57	8	16		17:23:49	3.8	33.8352	132.142	57	NEID
RT09	2020-05-17	11:39:12	35.1775	130.965	8	38		11:39:02	34.9866	131.808	8	20		11:38:27	4.6	33.6587	134.693	23	NEIC
RT10	2020-06-03	16:00:52	34.433	127.067	8	13	killed	16:00:56	34.4128	126.618	20	6		15:43:04	5.8	-7.0058	116.928	640	NEIC
		16:00:44	34.126	127.74	8	13	killed
		16:00:55	35.1661	126.603	8	10	killed
		16:00:34	33.1557	128.057	8	23	killed
		16:00:45	34.2015	127.661	8	22	killed
		16:01:02	35.5789	128.055	20.25	20	killed
		16:00:54	35.3274	127.677	8	20	killed
		16:01:03	36.5299	129.011	8	8	killed
		16:01:03	35.8845	128.249	8	19	killed
		16:01:03	36.5299	129.011	8	9
RT11	2020-06-12	11:31:07	34.3586	130.287	8	26								11:30:38	4.6	32.6312	132.187	48	NEIC
RT12	2020-06-13	15:52:14	32.4565	127.728	8	44		15:52:21	32.9293	127.567	8	13		15:51:24	6.1	28.8591	128.271	165	NEIC
RT13	2020-06-21	19:41:02	34.2559	127.614	8	21	killed	19:41:05	34.6299	127.577	8	16		19:33:08	5.5	-8.9266	110.949	87	NEIC
		19:41:11	35.3147	127.627	8	19	killed
RT14	2020-07-06	18:20:40	34.64	131.14	8	18	killed	18:20:58	35.3137	130.022	8	8		18:19:10	5.7	31.5275	138.126	12	NEIC
		18:20:48	35.732	130.871	8	16	killed
		18:20:55	36.5833	128.061	8	9	killed
		18:21:02	35.9912	129.106	36.3	23	killed
		18:20:54	35.924	128.364	8	15	killed
		18:21:04	35.2237	129.039	38.77	25
		18:21:02	36.0072	129.179	33.25	14
RT15	2020-07-11	03:00:21	38.7032	127.966	2.92	32		03:00:21	38.7227	127.977	1.83	30
RT16	2020-07-11	22:39:38	37.6065	124.782	1.5	40		22:39:39	37.6299	124.694	12.78	20		22:38:25	4.7	39.795	118.462	10	NEIC
RT17	2020-07-16	20:05:03	35.6095	128.959	39.5	21	killed	20:05:02	35.3955	129.597	20	6		20:03:09	5	30.299	136.804	499	NEIC
		20:05:01	35.4677	128.896	38.5	21	killed
		20:04:59	36.0795	128.669	8	20	killed
		20:05:00	35.9605	128.869	8	23	killed
		20:04:58	35.3046	128.661	12	18	killed
		20:04:37	33.8595	129.894	8	29	killed
		20:04:35	34.7612	130.884	8	32	killed
		20:05:11	37.1825	127.835	8	10	killed
		20:05:00	35.923	128.937	28.5	29	killed
		20:05:11	37.1825	127.835	8	11
RT18	2020-07-17	02:58:34	35.6145	127.797	8	11								02:50:23	6.9	-7.847	147.755	85	NEIC
		02:58:43	36.9192	127.901	8	6
RT19	2020-07-26	12:54:41	33.3803	126.023	8	31		12:54:40	33.304	125.959	8	19		12:52:30	5.3	24.274	122.455	53	NEIC
RT20	2020-07-27	17:37:46	33.4914	127.599	8	19	killed	17:37:52	33.8349	126.579	20	4	killed	17:32:45	5.7	9.022	126.27	38	NEIC
		17:38:06	35.0857	127.116	35.17	12	killed	17:37:46	33.5053	127.585	8	14
		17:37:40	33.5024	128.123	8	18	killed
		17:37:59	35.2604	127.775	8	24
RT21	2020-07-31	17:14:10	35.4406	127.608	8	7								17:06:01	5.2	-7.513	156.807	403	NEIC
		17:14:05	36.3253	128.286	8	10	killed
		17:14:10	36.5658	128.568	8	13
RT22	2020-08-05	12:15:33	35.5662	128.617	8	9	killed							12:05:36	6.4	-16.112	168.082	174	NEIC
		12:15:35	35.6248	128.469	8	10	killed
		12:15:32	35.9737	128.528	8	10	killed
		12:15:31	35.9606	128.508	8	15	killed
RT23	2020-08-06	15:35:43	35.6921	132.253	8	54		15:35:55	35.9986	131.176	8	19	killed	15:34:44	5.2	33.756	136.791	372	NEIC
RT24	2020-08-08	14:51:14	38.2443	129.745	8	13	killed	14:51:21	38.2393	129.227	8	5		14:42:55	5.5	54.799	-161.262	41	NEIC
		14:51:28	37.6039	127.972	8	12	killed
		14:51:28	37.6039	127.972	8	14	killed
		14:51:29	37.4716	128.074	8	15	killed
		14:51:12	37.7023	129.528	8	18	killed
		14:51:18	38.1118	127.408	8	14	killed
		14:51:30	36.3467	126.471	8	6
RT25	2020-08-12	23:24:38	38.0621	130.95	8	17	killed	23:24:52	36.6271	129.878	8	6		23:23:53	4.2	37.682	134.341	396	NEIC
		23:24:44	37.7808	130.239	8	13	killed
		23:24:58	36.9547	128.913	2	14
RT26	2020-08-21	04:16:29	34.7536	126.476	8	16								04:09:52	6.9	-6.67	123.493	627	NEIC
		04:16:46	36.1598	129.125	20.75	10	killed
		04:16:31	35.4644	127.615	8	18	killed
		04:16:51	37.0079	127.734	8	20	killed
RT27	2020-09-24	14:29:10	36.1956	130.694	8	12	killed	14:29:16	36.3859	130.027	8	10		14:28:11	4	35.81	135.671	356	NEIC
		14:29:25	35.8267	129.364	38.5	16
RT28	2020-10-06	10:22:02	35.63	128.506	8	8		10:22:08	35.9145	129.409	20	4	killed	10:11:46	6	-18.025	-178.491	628	NEIC
		10:21:56	36.1228	128.705	8	8	killed	10:22:01	36.3284	129.605	8	5
		10:21:58	36.4783	128.226	8	9	killed
RT29	2020-10-16	23:03:32	36.1522	130.517	8	11	killed							23:02:07	4.6	34.295	137.925	294	NEIC
		23:03:30	36.1874	130.68	8	13	killed
		23:03:43	36.2653	128.321	8	9	killed
		23:03:43	36.1857	129.331	8	18	killed
		23:03:47	36.496	129.238	29.22	13
RT30	2020-11-30	22:57:02	39.234	129.224	8	16	killed							22:54:35	6.4	48.258	140.81	586	NEIC
		22:57:20	37.2234	128.526	8	33
RT31	2020-12-24	20:39:06	33.339	129.388	8	30								00:20:38.310000	4.9	30.815	130.46	112	NEIC
RT32	2020-12-28	19:24:21	34.2665	131.029	8	28	killed	19:24:47	36.077	129.56	19	15		19:23:21	4.8	33.139	135.828	433	NEIC
		19:24:45	35.3641	129.029	8	20	killed
		19:24:32	35.3318	124.446	8	8	killed
		19:24:43	36.2537	129.715	8	33	killed
		19:24:45	35.4275	129.04	8	17
